# Supplementary material for: Workflow standardization of a novel team care model to improve chronic care: a quasi-experimental study
Source: Springer Nature journal article supplement (doi:10.1186/s12913-017-2240-1), 2017-04-19

# Champion | Chronic Care Management Training

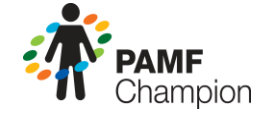

## DAY 1: Pre-Visit

| TIME  | PROVIDERS                                       | FLOW MANAGERS                                                                   |
|-------|-------------------------------------------------|---------------------------------------------------------------------------------|
| 8:00  | Kickoff                                         |                                                                                 |
| 9:00  | Break                                           |                                                                                 |
| 9:15  | Clinical Guidelines                             |                                                                                 |
| 9:50  | Panel Management                                |                                                                                 |
| 10:45 | Preparing for CCM Visits: Overview              |                                                                                 |
| 11:30 | Lunch                                           |                                                                                 |
| 12:00 | Lunch, continued.                               | <b>Schedule Grooming</b><br><b>Weekly Huddle</b><br><b>Patient Prep Contact</b> |
| 12:30 | Thinking Differently about Preparing for Visits |                                                                                 |
| 1:40  | <b>Weekly Huddle</b>                            |                                                                                 |
| 2:40  | <b>Patient Prep Contact</b><br>Live Practice    |                                                                                 |
| 3:00  | Break                                           |                                                                                 |
| 3:15  | Building the Team                               |                                                                                 |
| 4:40  | Experiment Expectations                         |                                                                                 |
| 4:50  | Process Check (+/-)                             |                                                                                 |
| 5:00  | Adjourn                                         |                                                                                 |

## DAY 2: Visit

| TIME  | PROVIDERS                                                                                                                                                   | FLOW MANAGERS                                                                                        |
|-------|-------------------------------------------------------------------------------------------------------------------------------------------------------------|------------------------------------------------------------------------------------------------------|
| 8:00  | Kick Off and Introduction                                                                                                                                   |                                                                                                      |
| 8:45  | Motivational Interviewing<br>Break<br>Overview of MA STW<br><b>Prepare Visit Plan</b><br><b>Warm Handoff</b><br><b>Visit</b><br><b>Post Visit Follow Up</b> | Day 1 STW Follow-Up<br><b>Rooming</b><br>Break<br><b>Warm Handoff</b><br><b>Post Visit Follow Up</b> |
| 12:10 | Lunch                                                                                                                                                       |                                                                                                      |
| 12:40 | <b>Warm Handoff</b><br><b>Discharge</b><br><b>Daily Huddle</b>                                                                                              |                                                                                                      |
| 1:00  | LIVE PRACTICE with Patients<br>Daily Huddle through Discharge                                                                                               |                                                                                                      |
| 3:45  | Debrief & Coaching                                                                                                                                          |                                                                                                      |
| 4:15  | Continuous Improvement Process                                                                                                                              |                                                                                                      |
| 4:45  | Process Check (+/-)                                                                                                                                         |                                                                                                      |
| 5:00  | Adjourn                                                                                                                                                     |                                                                                                      |

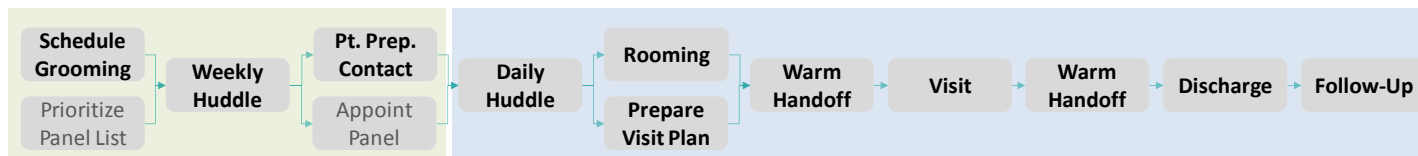

Supplement: MOESM1 [file 12231244]
