# Supplementary material for: Workflow standardization of a novel team care model to improve chronic care: a quasi-experimental study
Source: PubMed Central journal article supplement (PMC5395876; doi:10.1186/s12913-017-2240-1), 2017-04-19
Supplement: 12913_2017_2240_MOESM2_ESM.pdf [file 12913_2017_2240_MOESM2_ESM.pdf]

## Additional File 2: Propensity Score Weighting Metrics

The area under the ROC curve and the standardized mean differences for the four cohorts are provided below.

### I. Hypertension: Age 18-59

Logistic model for the Propensity Score

number of observations = 4385  
 area under ROC curve = 0.7026

**Additional File Table 1:** Patient characteristics of the cohorts in the Intervention vs Usual Care Clinic, before the first office visit, with propensity score weighting

|                      | Intervention<br>Clinic Mean | Usual Care Clinic<br>Mean | p-value for diff. | Standardized diff. |
|----------------------|-----------------------------|---------------------------|-------------------|--------------------|
| prop_score           | 0.33                        | 0.33                      | 0.88              | 0.006              |
| Age                  | 50.33                       | 50.16                     | 0.498             | 0.024              |
| Female               | 0.44                        | 0.43                      | 0.685             | 0.014              |
| PtAsian              | 0.35                        | 0.35                      | 0.986             | -0.001             |
| PtHispanic           | 0.09                        | 0.09                      | 0.967             | -0.001             |
| PtOther              | 0.16                        | 0.16                      | 0.981             | -0.001             |
| PtUnknown            | 0.05                        | 0.05                      | 0.879             | 0.005              |
| Ins_HMO              | 0.2                         | 0.2                       | 0.765             | 0.01               |
| Ins_Medicaid         | 0.02                        | 0.01                      | 0.837             | 0.012              |
| Ins_MedicareFFS      | 0.02                        | 0.02                      | 0.908             | 0.004              |
| Ins_MedicareHMO      | 0                           | 0                         | 0.9               | 0.007              |
| Ins_Oth              | 0                           | 0                         | .                 | .                  |
| PtCharlson           | 0.68                        | 0.67                      | 0.76              | 0.011              |
| Num_OV primary_care  | 3.58                        | 3.56                      | 0.85              | 0.006              |
| Num_OV_endocrinology | 0.18                        | 0.17                      | 0.873             | 0.006              |
| Num_OV_nephrology    | 0.05                        | 0.07                      | 0.33              | -0.026             |
| Num_OV_cardiology    | 0.16                        | 0.16                      | 0.971             | 0.001              |
| Num_OV_allspecialist | 3.89                        | 3.82                      | 0.727             | 0.01               |
| Num_telephone_call   | 7.2                         | 7.15                      | 0.882             | 0.005              |

## II. Hypertension: Age 60-80

Logistic model for the Propensity Score

number of observations = 4620

area under ROC curve = 0.7141

**Additional File Table 2:** Patient characteristics of the cohorts in the Intervention vs Usual Care Clinic, before the first office visit, with propensity score weighting

|                      | Intervention<br>Clinic Mean | Usual Care Clinic<br>Mean | p-value for diff. | Standardized diff. |
|----------------------|-----------------------------|---------------------------|-------------------|--------------------|
| prop_score           | 0.22                        | 0.21                      | 0.66              | 0.018              |
| Age                  | 69.43                       | 69.84                     | 0.135             | -0.069             |
| Female               | 0.53                        | 0.54                      | 0.556             | -0.026             |
| PtAsian              | 0.27                        | 0.27                      | 0.939             | 0.003              |
| PtHispanic           | 0.08                        | 0.08                      | 0.97              | 0.001              |
| PtOther              | 0.14                        | 0.14                      | 0.798             | 0.008              |
| PtUnknown            | 0.03                        | 0.03                      | 0.706             | 0.009              |
| Ins_HMO              | 0.08                        | 0.08                      | 0.83              | -0.007             |
| Ins_Medicaid         | 0.02                        | 0.01                      | 0.587             | 0.128              |
| Ins_MedicareFFS      | 0.5                         | 0.52                      | 0.529             | -0.028             |
| Ins_MedicareHMO      | 0.12                        | 0.13                      | 0.673             | -0.022             |
| Ins_Oth              | 0                           | 0                         | .                 | .                  |
| PtCharlson           | 1.29                        | 1.25                      | 0.501             | 0.027              |
| Num_OV primary_care  | 4.87                        | 4.92                      | 0.766             | -0.011             |
| Num_OV_endocrinology | 0.27                        | 0.27                      | 0.947             | 0.002              |
| Num_OV_nephrology    | 0.23                        | 0.25                      | 0.759             | -0.012             |
| Num_OV_cardiology    | 0.49                        | 0.48                      | 0.876             | 0.006              |
| Num_OV_allspecialist | 7.94                        | 8.07                      | 0.73              | -0.013             |
| Num_telephone_call   | 11.95                       | 12.08                     | 0.839             | -0.009             |

### III. Diabetes: Age 18-75

Logistic model for the Propensity Score

number of observations = 3767  
 area under ROC curve = 0.7062

**Additional File Table 3:** Patient characteristics of the cohorts in the Intervention vs Usual Care Clinic, before the first office visit, with propensity score weighting

|                      | Intervention Clinic Mean | Usual Care Clinic Mean | p-value for diff. | Standardized diff. |
|----------------------|--------------------------|------------------------|-------------------|--------------------|
| prop_score           | 0.41                     | 0.41                   | 0.613             | -0.027             |
| Age                  | 57.61                    | 57.34                  | 0.537             | 0.024              |
| Female               | 0.45                     | 0.45                   | 0.852             | 0.007              |
| PtAsian              | 0.38                     | 0.39                   | 0.703             | -0.014             |
| PtHispanic           | 0.11                     | 0.11                   | 0.888             | -0.005             |
| PtOther              | 0.16                     | 0.16                   | 0.96              | -0.002             |
| PtUnknown            | 0.05                     | 0.05                   | 0.727             | -0.018             |
| Ins_HMO              | 0.18                     | 0.18                   | 0.955             | -0.002             |
| Ins_Medicaid         | 0.02                     | 0.01                   | 0.887             | 0.008              |
| Ins_MedicareFFS      | 0.23                     | 0.22                   | 0.628             | 0.019              |
| Ins_MedicareHMO      | 0.05                     | 0.05                   | 0.705             | 0.023              |
| Ins_Oth              | 0                        | 0                      | 0.317             | 0.034              |
| PtCharlson           | 1.96                     | 1.91                   | 0.37              | 0.043              |
| Num_OV primary_care  | 4.78                     | 4.71                   | 0.673             | 0.018              |
| Num_OV_endocrinology | 0.6                      | 0.58                   | 0.816             | 0.01               |
| Num_OV_nephrology    | 0.24                     | 0.24                   | 0.962             | 0.002              |
| Num_OV_cardiology    | 0.39                     | 0.36                   | 0.482             | 0.028              |
| Num_OV_allspecialist | 7.19                     | 6.94                   | 0.52              | 0.025              |
| Num_telephone_call   | 12.47                    | 11.74                  | 0.295             | 0.05               |

#### IV. Diabetes: A1c

Logistic model for the Propensity Score

number of observations = 4441

area under ROC curve = 0.7348

**Additional File Table 4:** Patient characteristics of the cohorts in the Intervention vs Usual Care Clinic, before the first office visit, with propensity score weighting

|                      | Intervention Clinic Mean | Usual Care Clinic Mean | p-value for diff. | Standardized diff. |
|----------------------|--------------------------|------------------------|-------------------|--------------------|
| prop_score           | 0.37                     | 0.38                   | 0.648             | -0.023             |
| Age                  | 61.94                    | 61.84                  | 0.867             | 0.007              |
| Female               | 0.48                     | 0.47                   | 0.751             | 0.012              |
| PtAsian              | 0.36                     | 0.38                   | 0.529             | -0.022             |
| PtHispanic           | 0.11                     | 0.11                   | 0.897             | 0.005              |
| PtOther              | 0.15                     | 0.15                   | 0.943             | -0.002             |
| PtUnknown            | 0.05                     | 0.05                   | 0.705             | -0.018             |
| Ins_HMO              | 0.15                     | 0.15                   | 0.897             | -0.004             |
| Ins_Medicaid         | 0.01                     | 0.01                   | 0.887             | 0.008              |
| Ins_MedicareFFS      | 0.3                      | 0.3                    | 0.957             | 0.002              |
| Ins_MedicareHMO      | 0.1                      | 0.09                   | 0.638             | 0.028              |
| Ins_Oth              | 0                        | 0                      | 0.317             | 0.027              |
| PtCharlson           | 2.21                     | 2.14                   | 0.333             | 0.05               |
| Num_OV primary_care  | 5.43                     | 5.35                   | 0.635             | 0.02               |
| Num_OV_endocrinology | 0.63                     | 0.6                    | 0.663             | 0.019              |
| Num_OV_nephrology    | 0.34                     | 0.38                   | 0.73              | -0.016             |
| Num_OV_cardiology    | 0.55                     | 0.5                    | 0.425             | 0.03               |
| Num_OV_allspecialist | 8.58                     | 8.23                   | 0.401             | 0.032              |
| Num_telephone_call   | 14.74                    | 13.71                  | 0.239             | 0.063              |
