# Supplementary material for: Workflow standardization of a novel team care model to improve chronic care: a quasi-experimental study
Source: PubMed Central journal article supplement (PMC5395876; doi:10.1186/s12913-017-2240-1), 2017-04-19
Supplement: 12913_2017_2240_MOESM3_ESM.pdf [file 12913_2017_2240_MOESM3_ESM.pdf]

**Additional File 3: Clinical Outcomes for Patients with Clinical Outcomes above the HEDIS Threshold at the time of the Office Visit.**

**Table 3. Out of Control Patient and Provider Characteristics at the Primary Care Office Visit**

|                                             | Intervention Clinic<br>(n= 732) |       | Usual Care Clinic<br>(n= 2,737) |       | P Value |
|---------------------------------------------|---------------------------------|-------|---------------------------------|-------|---------|
|                                             | Mean/#                          | SD/%  | Mean/#                          | SD/%  |         |
| <i>Problem List diagnoses (n = 3,469 )</i>  |                                 |       |                                 |       |         |
| Hypertension Only                           | 318                             | 43.44 | 1588                            | 58.02 | <0.001  |
| Diabetes Only                               | 91                              | 12.43 | 131                             | 4.79  |         |
| Hypertension & Diabetes                     | 236                             | 32.24 | 646                             | 23.60 |         |
| Hypertension & Depression                   | 33                              | 4.51  | 227                             | 8.29  |         |
| Diabetes & Depression                       | 10                              | 1.37  | 20                              | 0.73  |         |
| Hypertension & Diabetes & Depression        | 44                              | 6.01  | 125                             | 4.57  |         |
| <i>Patient characteristics (n=3,469)</i>    |                                 |       |                                 |       |         |
| Female                                      | 335                             | 45.77 | 1341                            | 49.00 | 0.13    |
| Age, yrs                                    | 55.54                           | 11.86 | 58.2                            | 12.59 | <0.001  |
| <i>Race/Ethnicity</i>                       |                                 |       |                                 |       |         |
| White                                       | 145                             | 19.81 | 1222                            | 44.65 | <0.001  |
| Asian                                       | 262                             | 35.79 | 832                             | 30.40 |         |
| Hispanic                                    | 57                              | 7.79  | 275                             | 10.05 |         |
| Other                                       | 180                             | 24.59 | 360                             | 13.15 |         |
| Unknown                                     | 88                              | 12.02 | 48                              | 1.75  |         |
| <i>Insurance</i>                            |                                 |       |                                 |       |         |
| PPO                                         | 452                             | 61.75 | 1461                            | 53.38 | <0.001  |
| HMO                                         | 136                             | 18.58 | 382                             | 13.96 |         |
| Medicaid                                    | 2                               | 0.27  | 45                              | 1.64  |         |
| MedicareFFS                                 | 116                             | 15.85 | 635                             | 23.20 |         |
| MedicareHMO                                 | 20                              | 2.73  | 182                             | 6.65  |         |
| Self                                        | 6                               | 0.82  | 32                              | 1.17  |         |
| Other                                       | 0                               | 0.00  | 0                               | 0.00  |         |
| Charlson Score                              | 1.15                            | 1.27  | 1.06                            | 1.47  | <0.001  |
| <i>Physician characteristics (n=75)</i>     |                                 |       |                                 |       |         |
| Female                                      | 27                              | 71.1  | 24                              | 64.9  | 0.74    |
| <i>Specialty</i>                            |                                 |       |                                 |       |         |
| Family Medicine                             | 23                              | 60.5  | 14                              | 37.8  | 0.05    |
| Internal Medicine                           | 15                              | 39.5  | 23                              | 62.2  |         |
| <i>Patient panel characteristics (n=75)</i> |                                 |       |                                 |       |         |
| % Female                                    | 55.5                            | 4     | 55.5                            | 3.5   | 0.99    |
| <i>Age, yrs</i>                             |                                 |       |                                 |       |         |
| % Age1                                      | 28.4                            | 1.5   | 23.9                            | 2.3   | 0.1     |

|                     |      |     |      |     |        |
|---------------------|------|-----|------|-----|--------|
| % Age2              | 38.4 | 1.4 | 30.9 | 1.4 | <0.001 |
| % Age3              | 21.6 | 1.4 | 23.2 | 1.3 | 0.4    |
| % Age4              | 9.6  | 0.8 | 20.1 | 2.4 | <0.001 |
| Race/Ethnicity      |      |     |      |     |        |
| % White             | 18.8 | 1.6 | 45.8 | 2.3 | <0.001 |
| % Asian             | 38.1 | 1.8 | 31.6 | 2.5 | 0.04   |
| % Hispanic          | 6.6  | 0.5 | 7.9  | 0.8 | 0.18   |
| % Other             | 21.9 | 0.9 | 11.3 | 0.5 | <0.001 |
| % Unknown           | 14.7 | 0.5 | 3.4  | 0.3 | <0.001 |
| Insurance           |      |     |      |     |        |
| % PPO               | 59.4 | 0.8 | 53.9 | 1.6 | <0.01  |
| % HMO               | 14.3 | 0.5 | 12   | 0.4 | <0.001 |
| % Medicaid          | 0.3  | 0   | 0.7  | 0.1 | <0.001 |
| % MedicareFFS       | 6.9  | 0.6 | 12.6 | 1.4 | <0.001 |
| % MedicareHMO       | 0.9  | 0.1 | 3.8  | 0.7 | <0.001 |
| % Self              | 1.1  | 0.1 | 1.4  | 0.1 | 0.003  |
| % Other             | 17.1 | 1   | 15.7 | 1.4 | 0.4    |
| Mean Charlson Score | 0.3  | 0   | 0.5  | 0   | 0.01   |
| % Hypertension**    | 17.7 | 0.9 | 26.5 | 3.7 | <0.01  |
| % Diabetes**        | 7.3  | 0.4 | 8.8  | 1.5 | 0.35   |
| % Depression**      | 8    | 0.4 | 11.7 | 1.1 | <0.01  |
| Mean Panel Size     | 1537 | 88  | 1800 | 127 | 0.09   |

\* P value based on a ttest with unequal variances.

\*\* Based on a diagnosis of diabetes (ICD 9 codes 249.%, 250.%), hypertension (ICD 9 code 401.%), or depression (ICD 9 codes 300.4, 311, 648.44, 296.%) on the problem list.

\*\* Intervention Period 10/2013 – 9/2014

Thanks to Gabe' suggestions, we found some mistakes in my previous table, and the things I modified here include the counts under Problem List diagnoses and p-values for count data among groups(I used "Pearson's Chi-squared Test for Count Data" instead of "Test of Equal or Given Proportions"), and also the pvalue for Charlson Score since Gabe found the Charlson Score is not normally distributed, so I used "Mann-Whitney U Test" instead of "two sample t-test".

**Table 4. Summary Statistics for Hypertension and Diabetes HEDIS Clinical Outcomes – Out of Control Patients**

|                                            | Intervention Clinic (n=732)                                            |                                                             |                                                               | Usual Care Clinic (n=2,737)                                            |                                                             |                                                               | P Values                                                                    |                                                                               |
|--------------------------------------------|------------------------------------------------------------------------|-------------------------------------------------------------|---------------------------------------------------------------|------------------------------------------------------------------------|-------------------------------------------------------------|---------------------------------------------------------------|-----------------------------------------------------------------------------|-------------------------------------------------------------------------------|
|                                            | <i>Pre Period<br/>720-0 Days<br/>Before<br/>First Office<br/>Visit</i> | <i>Post Period<br/>1-180 Days<br/>After First<br/>Visit</i> | <i>Post Period<br/>181-365<br/>Days After<br/>First Visit</i> | <i>Pre Period<br/>720-0 Days<br/>Before<br/>First Office<br/>Visit</i> | <i>Post Period<br/>1-180 Days<br/>After First<br/>Visit</i> | <i>Post Period<br/>181-365<br/>Days After<br/>First Visit</i> | <i>Difference<br/>in<br/>Differences<br/>1-180<br/>Days After<br/>Visit</i> | <i>Difference<br/>in<br/>Differences<br/>181-365<br/>Days After<br/>Visit</i> |
| <i>Hypertension - Age 18-59 (n=1,680)</i>  |                                                                        |                                                             |                                                               |                                                                        |                                                             |                                                               |                                                                             |                                                                               |
| Systolic, mean (SD)                        | 139.9 (11.6)                                                           | 135.7 (14.9)                                                | 138.1 (15.9)                                                  | 142.6 (12.4)                                                           | 138.1 (14.0)                                                | 138.5 (16.0)                                                  | 0.83                                                                        | 0.15                                                                          |
| Diastolic, mean (SD)                       | 87.7 (7.7)                                                             | 84.3 (9.2)                                                  | 84 (8.8)                                                      | 88.6 (8.2)                                                             | 85.6 (9.2)                                                  | 85.2 (9.9)                                                    | 0.51                                                                        | 0.43                                                                          |
| Num patients per period                    | 367                                                                    | 209                                                         | 68                                                            | 1313                                                                   | 778                                                         | 346                                                           |                                                                             |                                                                               |
| <i>Hypertension - Age 60-80 (n= 1,074)</i> |                                                                        |                                                             |                                                               |                                                                        |                                                             |                                                               |                                                                             |                                                                               |
| Systolic, mean (SD)                        | 143.8 (12.7)                                                           | 141.9 (15.1)                                                | 141.1 (14.6)                                                  | 146.3 (12.9)                                                           | 144.3 (16.0)                                                | 142.6 (15.2)                                                  | 0.59                                                                        | 0.15                                                                          |
| Diastolic, mean (SD)                       | 80.5 (8.8)                                                             | 77.5 (9.7)                                                  | 75.8 (7.1)                                                    | 81 (8.7)                                                               | 78.6 (9.9)                                                  | 77.7 (9.3)                                                    | 0.955                                                                       | 0.45                                                                          |
| Num patients per period                    | 148                                                                    | 101                                                         | 43                                                            | 926                                                                    | 623                                                         | 322                                                           |                                                                             |                                                                               |
| <i>Diabetes- Age 18-75 (n=870)</i>         |                                                                        |                                                             |                                                               |                                                                        |                                                             |                                                               |                                                                             |                                                                               |
| Systolic, mean (SD)                        | 139.4 (10.8)                                                           | 137.5 (14.3)                                                | 135.5 (14.8)                                                  | 141.4 (13.0)                                                           | 140.3 (15.0)                                                | 139.1 (16.5)                                                  | 0.253                                                                       | 0.12                                                                          |
| Diastolic, mean (SD)                       | 82 (8.4)                                                               | 78.5 (8.8)                                                  | 78.1 (8.8)                                                    | 80.5 (9.0)                                                             | 79.2 (10.5)                                                 | 78.2 (9.9)                                                    | 0.247                                                                       | 0.74                                                                          |
| Num patients per period                    | 260                                                                    | 183                                                         | 86                                                            | 610                                                                    | 413                                                         | 246                                                           |                                                                             |                                                                               |
| <i>Diabetes (n=472)</i>                    |                                                                        |                                                             |                                                               |                                                                        |                                                             |                                                               |                                                                             |                                                                               |
| A1c, mean(SD)                              | 9.9 (1.7)                                                              | 9.0 (1.7)                                                   | 8.5 (2.0)                                                     | 9.9 (1.5)                                                              | 9.4 (1.9)                                                   | 9.2 (1.8)                                                     | <0.01                                                                       | 0.7                                                                           |
| Num patients                               | 158                                                                    | 84                                                          | 46                                                            | 314                                                                    | 164                                                         | 110                                                           |                                                                             |                                                                               |

**Table 5. Adjusted Results from a Piecewise Linear Growth Curve Model of HEDIS Clinical Outcomes for Patients with a Primary Care Office Visit – Out of Control Patients**

|                                                   | <b>Hypertension: Age18-59</b> |                          | <b>Hypertension: Age 60-80</b> |                          | <b>Diabetes: Age 18-75</b> |                          | <b>Diabetes</b>          |
|---------------------------------------------------|-------------------------------|--------------------------|--------------------------------|--------------------------|----------------------------|--------------------------|--------------------------|
|                                                   | <i>Systolic</i>               | <i>Diastolic</i>         | <i>Systolic</i>                | <i>Diastolic</i>         | <i>Systolic</i>            | <i>Diastolic</i>         | <i>A1c</i>               |
|                                                   | Est. (95% CI)                 | Est. (95% CI)            | Est. (95% CI)                  | Est. (95% CI)            | Est. (95% CI)              | Est. (95% CI)            | Est. (95% CI)            |
| Intervention Clinic                               | 1.85<br>(-12.86,16.57)        | 2.88<br>(-4.12,9.88)     | -38.82<br>(-98.07,20.42)       | 1.54<br>(-26.02,29.10)   | -1.26<br>(-8.01,5.48)      | 4.59<br>(-2.00,11.17)    | -4.6<br>(-14.80,5.61)    |
| Before First Office Visit                         | 2.06<br>(0.94,3.17)**         | 1.5<br>(0.76,2.24)**     | 3.77<br>(1.92,5.61)**          | 1.03<br>(-0.03,2.09)     | 3.7<br>(1.85,5.55)**       | 0.83<br>(-0.36,2.02)     | 0.63<br>(0.35,0.91)**    |
| 1-180 Days Post Visit                             | -11.89<br>(-13.93,-9.84)**    | -6.37<br>(-7.70,-5.04)** | -11.57<br>(-14.53,-8.60)**     | -6.87<br>(-8.54,-5.21)** | -9.81<br>(-12.62,-6.99)**  | -4.24<br>(-5.82,-2.67)** | -1.83<br>(-2.27,-1.38)** |
| 181-365 Days Post Visit                           | 4.37<br>(0.05,8.70)*          | 2.89<br>(0.20,5.58)*     | 2.59<br>(-1.84,7.01)           | 1.27<br>(-1.25,3.79)     | 1.27<br>(-3.91,6.46)       | 0.42<br>(-2.12,2.96)     | 1<br>(0.17,1.84)*        |
| Intervention Clinic x<br>Before Visit             | -0.2<br>(-1.06,0.66)          | -0.17<br>(-0.69,0.36)    | 0.61<br>(-0.35,1.57)           | 0.07<br>(-0.55,0.70)     | 0.83<br>(-0.13,1.79)       | -0.05<br>(-0.61,0.51)    | 0.07<br>(-0.16,0.30)     |
| Intervention Clinic x 1-<br>180 Days Post Visit   | 0.01<br>(-4.69,4.71)          | -1.31<br>(-3.74,1.11)    | -2.85<br>(-6.97,1.27)          | -1.15<br>(-5.14,2.84)    | -2.5<br>(-6.31,1.31)       | -0.71<br>(-3.35,1.94)    | -0.66<br>(-1.33,0.003)   |
| Intervention Clinic x 181-<br>360 Days Post Visit | 1.28<br>(-8.03,10.59)         | 2.95<br>(-3.59,9.50)     | 7.31<br>(-11.36,25.99)         | -1.46<br>(-13.46,10.55)  | 3.73<br>(-7.93,15.40)      | -3.12<br>(-10.56,4.32)   | -0.46<br>(-1.85,0.93)    |
| Observations                                      | 14,388                        | 14,385                   | 12,354                         | 12,351                   | 11,096                     | 11,095                   | 2,122                    |
| Num Patients                                      | 1,680                         | 1,680                    | 1,074                          | 1,074                    | 870                        | 870                      | 472                      |

## Propensity Score Weighting Metrics - Out of Control Cohorts

The area under the ROC curve and the standardized mean differences for the four cohorts are provided below.

### I. Hypertension: Age 18-59

Logistic model for the Propensity Score

number of observations = 1680

area under ROC curve = 0.7158

**Table 1:** Patient characteristics of the cohorts in the Intervention vs Usual Care Clinic, before the first office visit, with propensity score weighting

|                      | Intervention<br>Clinic Mean | Usual Care Clinic<br>Mean | p-value for diff. | Standardized diff. |
|----------------------|-----------------------------|---------------------------|-------------------|--------------------|
| prop_score           | 0.22                        | 0.22                      | 0.841             | -0.014             |
| Age                  | 49.34                       | 49.31                     | 0.969             | 0.003              |
| Female               | 0.42                        | 0.43                      | 0.638             | -0.033             |
| PtAsian              | 0.34                        | 0.34                      | 0.919             | -0.007             |
| PtHispanic           | 0.1                         | 0.09                      | 0.884             | 0.012              |
| PtOther              | 0.16                        | 0.17                      | 0.886             | -0.008             |
| PtUnknown            | 0.04                        | 0.04                      | 0.997             | 0                  |
| Ins_HMO              | 0.19                        | 0.19                      | 0.966             | -0.003             |
| Ins_Medicaid         | 0.04                        | 0.02                      | 0.488             | 0.172              |
| Ins_MedicareFFS      | 0.02                        | 0.02                      | 0.639             | 0.039              |
| Ins_MedicareHMO      | 0                           | 0                         | 0.77              | -0.014             |
| Ins_Oth              | 0                           | 0                         |                   |                    |
| PtCharlson           | 0.56                        | 0.58                      | 0.777             | -0.016             |
| Num_OV_primary_care  | 3.13                        | 3.27                      | 0.482             | -0.045             |
| Num_OV_endocrinology | 0.1                         | 0.12                      | 0.699             | -0.024             |
| Num_OV_nephrology    | 0.05                        | 0.07                      | 0.671             | -0.015             |
| Num_OV_cardiology    | 0.1                         | 0.13                      | 0.499             | -0.038             |
| Num_OV_allspecialist | 3.45                        | 3.42                      | 0.932             | 0.005              |
| Num_telephone_call   | 6.74                        | 6.74                      | 0.998             | 0                  |

## II. Hypertension: Age 60-80

Logistic model for the Propensity Score

number of observations = 1074

area under ROC curve = 0.7046

**Table 2:** Patient characteristics of the cohorts in the Intervention vs Usual Care Clinic, before the first office visit, with propensity score weighting

|                      | Intervention Clinic Mean | Usual Care Clinic Mean | p-value for diff. | Standardized diff. |
|----------------------|--------------------------|------------------------|-------------------|--------------------|
| prop_score           | 0.14                     | 0.14                   | 0.846             | 0.013              |
| Age                  | 69.39                    | 69.78                  | 0.483             | -0.065             |
| Female               | 0.53                     | 0.56                   | 0.529             | -0.064             |
| PtAsian              | 0.28                     | 0.26                   | 0.627             | 0.05               |
| PtHispanic           | 0.06                     | 0.07                   | 0.675             | -0.03              |
| PtOther              | 0.14                     | 0.13                   | 0.751             | 0.024              |
| PtUnknown            | 0.03                     | 0.03                   | 0.921             | -0.004             |
| Ins_HMO              | 0.06                     | 0.07                   | 0.695             | -0.03              |
| Ins_Medicaid         | 0                        | 0.01                   | 0.013             | -0.161             |
| Ins_MedicareFFS      | 0.49                     | 0.5                    | 0.782             | -0.028             |
| Ins_MedicareHMO      | 0.13                     | 0.13                   | 1                 | 0                  |
| Ins_Oth              | 0                        | 0                      | .                 | .                  |
| PtCharlson           | 1.26                     | 1.14                   | 0.386             | 0.083              |
| Num_OV primary_care  | 4.64                     | 4.5                    | 0.649             | 0.04               |
| Num_OV_endocrinology | 0.3                      | 0.22                   | 0.631             | 0.073              |
| Num_OV_nephrology    | 0.23                     | 0.22                   | 0.924             | 0.009              |
| Num_OV_cardiology    | 0.59                     | 0.37                   | 0.26              | 0.174              |
| Num_OV_allspecialist | 8.12                     | 7.06                   | 0.577             | 0.122              |
| Num_telephone_call   | 11.17                    | 10.41                  | 0.632             | 0.069              |

### III. Diabetes: Age 18-75

Logistic model for the Propensity Score

number of observations = 870

area under ROC curve = 0.7058

**Table 3:** Patient characteristics of the cohorts in the Intervention vs Usual Care Clinic, before the first office visit, with propensity score weighting

|                      | Intervention Clinic Mean | Usual Care Clinic Mean | p-value for diff. | Standardized diff. |
|----------------------|--------------------------|------------------------|-------------------|--------------------|
| prop_score           | 0.30                     | 0.31                   | 0.502             | -0.071             |
| Age                  | 60.12                    | 59.28                  | 0.372             | 0.078              |
| Female               | 0.50                     | 0.48                   | 0.704             | 0.033              |
| PtAsian              | 0.33                     | 0.34                   | 0.749             | -0.025             |
| PtHispanic           | 0.12                     | 0.12                   | 0.950             | 0.006              |
| PtOther              | 0.18                     | 0.19                   | 0.948             | -0.005             |
| PtUnknown            | 0.04                     | 0.05                   | 0.556             | -0.054             |
| Ins_HMO              | 0.17                     | 0.17                   | 0.813             | 0.021              |
| Ins_Medicaid         | 0.00                     | 0.03                   | 0.002             | -0.278             |
| Ins_MedicareFFS      | 0.29                     | 0.26                   | 0.419             | 0.078              |
| Ins_MedicareHMO      | 0.05                     | 0.06                   | 0.718             | -0.033             |
| Ins_Oth              | 0.00                     | 0.00                   | .                 | .                  |
| PtCharlson           | 2.28                     | 2.15                   | 0.478             | 0.094              |
| Num_OV_primary_care  | 4.75                     | 4.71                   | 0.909             | 0.011              |
| Num_OV_endocrinology | 0.58                     | 0.50                   | 0.654             | 0.050              |
| Num_OV_nephrology    | 0.38                     | 0.38                   | 0.969             | 0.003              |
| Num_OV_cardiology    | 0.36                     | 0.33                   | 0.740             | 0.023              |
| Num_OV_allspecialist | 7.69                     | 7.42                   | 0.768             | 0.024              |
| Num_telephone_call   | 12.84                    | 12.66                  | 0.896             | 0.011              |

#### IV. Diabetes: A1c

Logistic model for the Propensity Score

number of observations = 472

area under ROC curve = 0.7295

**Table 4:** Patient characteristics of the cohorts in the Intervention vs Usual Care Clinic, before the first office visit, with propensity score weighting

|                      | Intervention Clinic Mean | Usual Care Clinic Mean | p-value for diff. | Standardized diff. |
|----------------------|--------------------------|------------------------|-------------------|--------------------|
| prop_score           | 0.33                     | 0.34                   | 0.921             | -0.015             |
| Age                  | 56.42                    | 56.15                  | 0.855             | 0.02               |
| Female               | 0.51                     | 0.48                   | 0.57              | 0.068              |
| PtAsian              | 0.32                     | 0.33                   | 0.877             | -0.017             |
| PtHispanic           | 0.17                     | 0.18                   | 0.886             | -0.016             |
| PtOther              | 0.16                     | 0.16                   | 0.883             | -0.014             |
| PtUnknown            | 0.04                     | 0.04                   | 0.898             | 0.014              |
| Ins_HMO              | 0.2                      | 0.19                   | 0.79              | 0.029              |
| Ins_Medicaid         | 0                        | 0.02                   | 0.008             | -0.211             |
| Ins_MedicareFFS      | 0.16                     | 0.17                   | 0.906             | -0.012             |
| Ins_MedicareHMO      | 0.1                      | 0.08                   | 0.628             | 0.111              |
| Ins_Oth              | 0                        | 0                      | .                 | .                  |
| PtCharlson           | 2.17                     | 2.13                   | 0.874             | 0.029              |
| Num_OV_primary_care  | 4.88                     | 4.47                   | 0.56              | 0.103              |
| Num_OV_endocrinology | 0.88                     | 0.95                   | 0.713             | -0.039             |
| Num_OV_nephrology    | 0.19                     | 0.19                   | 0.957             | 0.007              |
| Num_OV_cardiology    | 0.33                     | 0.34                   | 0.931             | -0.011             |
| Num_OV_allspecialist | 7.84                     | 7.28                   | 0.719             | 0.05               |
| Num_telephone_call   | 14.69                    | 12.78                  | 0.563             | 0.127              |
