# Supplementary material for: Workflow standardization of a novel team care model to improve chronic care: a quasi-experimental study
Source: PubMed Central journal article supplement (PMC5395876; doi:10.1186/s12913-017-2240-1), 2017-04-19
Supplement: 12913_2017_2240_MOESM4_ESM.pdf [file 12913_2017_2240_MOESM4_ESM.pdf]

**Additional File 4: Adjusted A1c Outcomes for Diabetes Patients with Pre-visit A1c  $\geq 9.0$ , A1c  $\geq 8.5$ , and A1c  $\geq 8.0$**

**Table 5. Adjusted Results from a Piecewise Linear Growth Curve Model of A1c for Diabetes Patients with a Primary Care Office Visit – Pre-visit A1c  $\geq 9.0$ , A1c  $\geq 8.5$ , and A1c  $\geq 8.0$**

|                                               | <b>Diabetes</b><br><i>A1c <math>\geq 9.0</math></i><br>Est. (95% CI) | <b>Diabetes</b><br><i>A1c <math>\geq 8.5</math></i><br>Est. (95% CI) | <b>Diabetes</b><br><i>A1c <math>\geq 8.0</math></i><br>Est. (95% CI) |
|-----------------------------------------------|----------------------------------------------------------------------|----------------------------------------------------------------------|----------------------------------------------------------------------|
| Intervention Clinic                           | -4.6<br>(-14.80,5.61)                                                | -3.33<br>(-11.41,4.75)                                               | 0.52<br>(-1.26,2.31)                                                 |
| Before First Office Visit                     | 0.63<br>(0.35,0.91)**                                                | 0.5<br>(0.28,0.72)**                                                 | 0.47<br>(0.29,0.65)**                                                |
| 1-180 Days Post Visit                         | -1.83<br>(-2.27,-1.38)**                                             | -1.18<br>(-1.55,-0.82)**                                             | -0.83<br>(-1.13,-0.54)**                                             |
| 181-365 Days Post Visit                       | 1<br>(0.17,1.84)*                                                    | 0.35<br>(-0.30,1.00)                                                 | 0.23<br>(-0.27,0.73)                                                 |
| Intervention Clinic x Before Visit            | 0.07<br>(-0.16,0.30)                                                 | 0.09<br>(-0.07,0.25)                                                 | 0.07<br>(-0.05,0.19)                                                 |
| Intervention Clinic x 1-180 Days Post Visit   | -0.66<br>(-1.33,0.003)                                               | -0.71<br>(-1.21,-0.21)**                                             | -0.75<br>(-1.14,-0.36)**                                             |
| Intervention Clinic x 181-360 Days Post Visit | -0.46<br>(-1.85,0.93)                                                | -0.08<br>(-1.24,1.09)                                                | 0.19<br>(-0.84,1.23)                                                 |
| Observations                                  | 2,122                                                                | 3,311                                                                | 4,989                                                                |
| Num Patients                                  | 472                                                                  | 692                                                                  | 978                                                                  |
